# Supplementary material
Source: HighWire-hosted journal article supplement (https://erj.ersjournals.com/content/56/4/2000803)
Supplement: inline-supplementary-material-1 [file inline-supplementary-material-1.pdf]

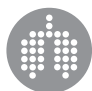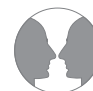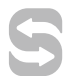

SHAREABLE PDF

# Dose optimisation of first-line tuberculosis drugs using therapeutic drug monitoring in saliva: feasible for rifampicin, not for isoniazid

Simone H.J. van den Elsen<sup>1,2</sup>, Onno W. Akkerman<sup>3,4</sup>, Mireille Wessels<sup>1</sup>, Erwin M. Jongedijk<sup>1</sup>, Samiksha Ghimire<sup>1</sup>, Tjip S. van der Werf<sup>4,5</sup>, Mathieu S. Bolhuis<sup>1</sup>, Daan J. Touw<sup>1</sup> and Jan-Willem C. Alffenaar<sup>1,6,7,8</sup>

**Affiliations:** <sup>1</sup>University of Groningen, University Medical Center Groningen, Dept of Clinical Pharmacy and Pharmacology, Groningen, The Netherlands. <sup>2</sup>Hospital Group Twente, Dept of Clinical Pharmacy, Almelo and Hengelo, The Netherlands. <sup>3</sup>University of Groningen, University Medical Center Groningen, Tuberculosis Center Beatrixoord, Haren, The Netherlands. <sup>4</sup>University of Groningen, University Medical Center Groningen, Dept of Pulmonary Diseases and Tuberculosis, Groningen, The Netherlands. <sup>5</sup>University of Groningen, University Medical Center Groningen, Dept of Internal Medicine, Groningen, The Netherlands. <sup>6</sup>Sydney Pharmacy School, Faculty of Medicine and Health, The University of Sydney, Sydney, Australia. <sup>7</sup>Westmead Hospital, Sydney, Australia. <sup>8</sup>Marie Bashir Institute of Infectious Diseases and Biosecurity, Sydney, Australia.

**Correspondence:** Jan-Willem C. Alffenaar, University of Sydney, Faculty of Medicine and Health, School of Pharmacy, Pharmacy Building A15, Sydney, NSW 2006, Australia. E-mail: [johannes.alffenaar@sydney.edu.au](mailto:johannes.alffenaar@sydney.edu.au)

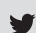

@ERSpublications

**Therapeutic drug monitoring using saliva samples is feasible for rifampicin, despite low penetration, but is not feasible for isoniazid, which showed inexplicable highly variable saliva/serum concentration ratios** <https://bit.ly/2yAS2Jc>

**Cite this article as:** van den Elsen SHJ, Akkerman OW, Wessels M, *et al.* Dose optimisation of first-line tuberculosis drugs using therapeutic drug monitoring in saliva: feasible for rifampicin, not for isoniazid. *Eur Respir J* 2020; 56: 2000803 [<https://doi.org/10.1183/13993003.00803-2020>].

This single-page version can be shared freely online.

## To the Editor:

The persisting worldwide burden of tuberculosis (TB) is worrisome. In 2018, an estimated 10 million individuals developed TB and 1.45 million infected individuals died [1]. The increase in drug resistance is an important point of concern. Resistance can be acquired by inappropriate drug management, noncompliance and insufficient drug exposure [2, 3]. The last is frequently described for the first-line TB drugs rifampicin and isoniazid due to large interindividual pharmacokinetic variability [3]. Therapeutic drug monitoring (TDM) can be used to verify drug exposure and adjust individual drug dosages if needed [4]. The efficacy of rifampicin and isoniazid is associated with the ratio of the steady-state area under the concentration–time curve from 0 to 24 h ( $AUC_{0-24}$ ) to minimal inhibitory concentration with a target value of >271 for rifampicin and >567 for isoniazid [5, 6]. Traditional TDM uses plasma or serum samples, whereas other matrices such as dried blood spot and saliva have been recommended as alternatives suitable for programmatic use [4, 7]. Collecting saliva samples is noninvasive and simple with the perspective of home-based self-sampling [8]. Salivary concentrations of rifampicin and isoniazid have been studied before, but highly variable saliva/serum concentration ratios across studies were observed [8]. Moreover, none of these studies assessed the feasibility of TDM using saliva samples.
